# Supplementary material for: Alteration of Chain Length Selectivity of Candida antarctica Lipase A by Semi‐Rational Design for the Enrichment of Erucic and Gondoic Fatty Acids
Source: PubMed Central journal article supplement — Adv Synth Catal. 2018 Sep 26;360(21):4115–31. doi: 10.1002/adsc.201800889 (PMC6283244; doi:10.1002/adsc.201800889), 2018-09-26
Supplement: ADSC-360-4115-s001.pdf [file ADSC-360-4115-s001.pdf]

*Advanced*   
**Synthesis &  
Catalysis**

Supporting Information

# Alteration of Chain Length Selectivity of *Candida antarctica* Lipase A by Semi-Rational Design for the Enrichment of Erucic and Gondoic Fatty Acids

Katja Zorn<sup>a1</sup>, Isabel Oroz-Guinea<sup>a1</sup>, Henrike Brundiek<sup>b</sup>, Mark Dörr<sup>a</sup> and Uwe T. Bornscheuer<sup>a\*</sup>

<sup>a</sup>University of Greifswald, Institute of Biochemistry, Dept. of Biotechnology & Enzyme Catalysis, Felix-Hausdorff-Str. 4, 17487 Greifswald, Germany

Fax: (+49) 3834 420 744367; phone: (+49) 3834 420 4367; email: uwe.bornscheuer@uni-greifswald.de

<sup>b</sup>Enzymicals AG, Walther-Rathenau-Str. 49a, 17489 Greifswald, Germany.

<sup>1</sup>Equal contribution.

## Supplementary information

**Table S1.** Comparison of different methods to generate site-directed saturation mutagenesis libraries, including the number of primers used, the number of codons contained, the number of amino acids and stop codons encoded, and the screening effort required for the simultaneous saturation of 1, 2 or 3 positions to achieve a 95 % library coverage.

| Degenerate primers         | Number of primers | Number of codons | Number of aa (Stop codon) | 1 Pos. | 2 Pos. | 3 Pos.  |
|----------------------------|-------------------|------------------|---------------------------|--------|--------|---------|
| NNN                        | 1                 | 64               | 20 (3)                    | 192    | 12 288 | 786 432 |
| NNK                        | 1                 | 32               | 20 (1)                    | 96     | 3 072  | 98 304  |
| 22c-trick <sup>[19a]</sup> | 3                 | 22               | 20 (0)                    | 66     | 1 450  | 31 899  |
| 20c-trick <sup>[19b]</sup> | 4                 | 20               | 20 (0)                    | 60     | 1 200  | 24 000  |
| NDT                        | 1                 | 9                | 9 (0)                     | 36     | 432    | 5 184   |

**Table S2.** Amino acid changes present in the CAL-A variants chosen from the high-throughput screening for further analysis.

| Variant | V238 | V286 | V290 | Additional mutation |
|---------|------|------|------|---------------------|
| V1      | L    | -    | L    |                     |
| V2      | Y    | -    | N    |                     |
| V3      | I    | -    | M    |                     |
| V4      | M    | H    | -    |                     |
| V5      | L    | H    | -    |                     |
| V6      | L    | H    | M    |                     |
| V7      | I    | -    | -    |                     |
| V8      | S    | -    | T    |                     |
| V9      | -    | Q    | W    |                     |
| V10     | L    | Q    | -    |                     |
| V11     | L    | -    | T    | P399Q               |
| V12     | L    | -    | N    |                     |
| V13     | -    | R    | E    | E335K               |
| V14     | L    | -    | H    |                     |
| V15     | I    | -    | L    | N285D               |

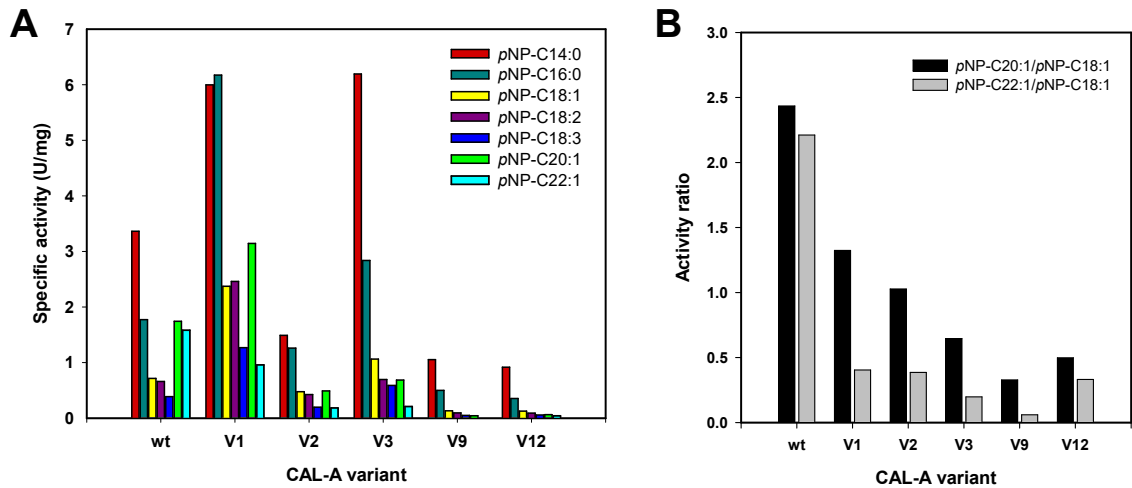

**Figure S1.** (A) Chain length profile displayed by the selected CAL-A variants (wt, V1, V2, V3, V9 and V12) overexpressed in *P. pastoris* towards pNP-C14:0 (■), -C16:0 (■), -C18:1 (■), -C18:2 (■), -C18:3 (■), -C20:1 (■) and -C22:1 (■). (B) Activity ratios calculated for the aforementioned CAL-A variants: pNP-C20:1/pNP-C18:1 (■), pNP-C22:1/pNP-C18:1 (■).

**Table S3.** Protein concentration present in the supernatant obtained during the small scale *P. pastoris* overexpression of the different CAL-A variants. All the samples were previously desalted before quantification. 1Mut: single mutant. 2Mut: double mutant. 3Mut: triple mutant.

| CAL-A 1Mut variants   | V238L | V238I | V238Y | V286Q | V290L | V290M | V290N | V290W |
|-----------------------|-------|-------|-------|-------|-------|-------|-------|-------|
| Protein conc. (mg/ml) | 1.7   | 1.6   | 1.6   | 2.1   | 1.6   | 1.7   | 1.6   | 1.7   |

  

| CAL-A 2Mut variants   | V1  | V2  | V3  | V9  | V12 |
|-----------------------|-----|-----|-----|-----|-----|
| Protein conc. (mg/ml) | 1.7 | 1.6 | 2.0 | 1.7 | 2.1 |

  

| CAL-A 3Mut variants   | V16 | V17 | V18 | V19 | V20 |
|-----------------------|-----|-----|-----|-----|-----|
| Protein conc. (mg/ml) | 1.7 | 1.7 | 2.0 | 1.7 | 2.1 |

  

| CAL A                 | wt  |
|-----------------------|-----|
| Protein conc. (mg/ml) | 1.8 |

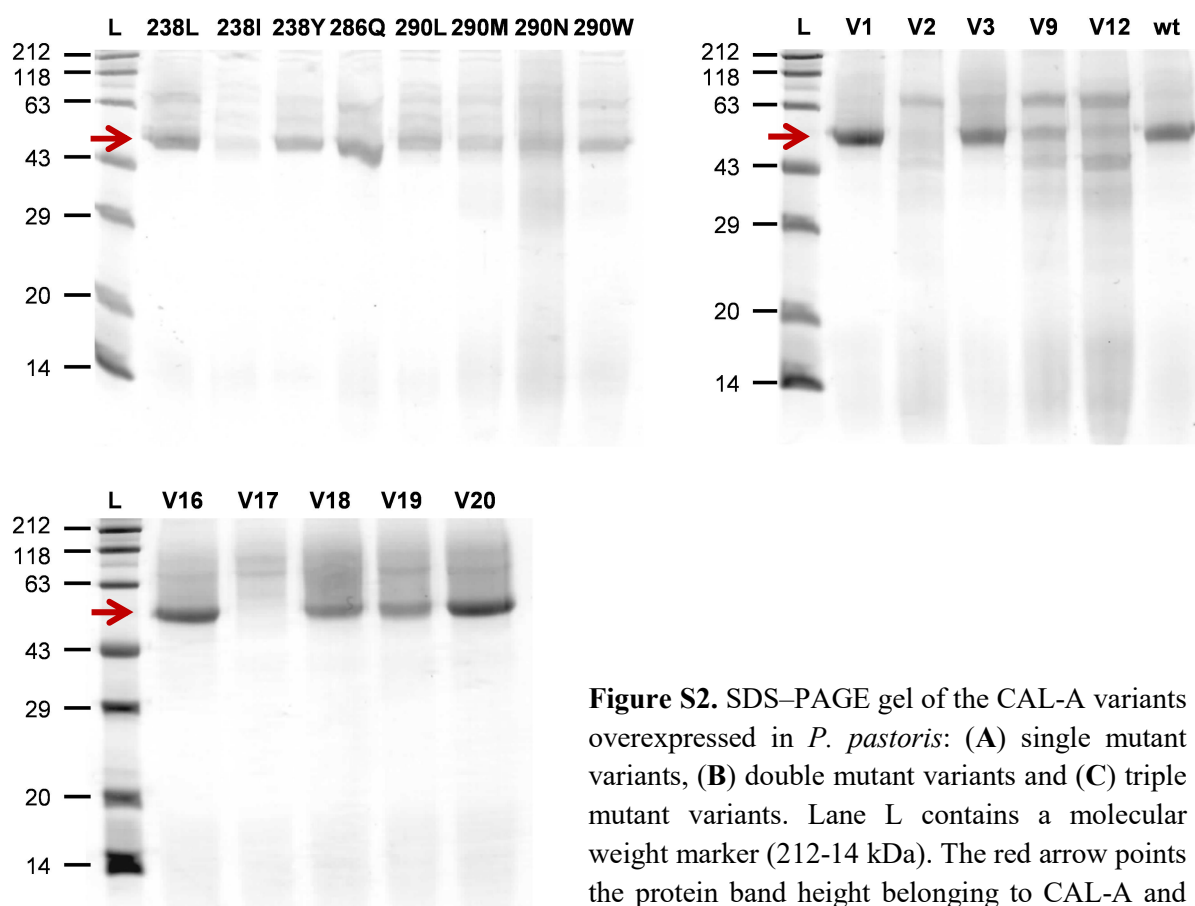

**Figure S2.** SDS-PAGE gel of the CAL-A variants overexpressed in *P. pastoris*: (A) single mutant variants, (B) double mutant variants and (C) triple mutant variants. Lane L contains a molecular weight marker (212-14 kDa). The red arrow points the protein band height belonging to CAL-A and its variants.

**Table S4.** Summary of the protein concentration and the hydrolytic activity towards *p*NP-C14:0 quantified for the fermented CAL-A variants. Hydrolytic activity was determined twice, firstly for the supernatant collected at the end of the fermentation ( $t=162$  h; U/ml<sub>SN</sub>), and subsequently for the same sample after a desalting step (U/ml<sub>dSN</sub>). Protein concentration was determined for the latter aliquot.

| CAL-A variant | Concentration (mg <sub>prot</sub> /ml <sub>dSN</sub> ) | Activity <sub>1</sub> (U/ml <sub>SN</sub> ) | Activity <sub>2</sub> (U/ml <sub>dSN</sub> ) | Activity (U/mg <sub>prot</sub> ) |
|---------------|--------------------------------------------------------|---------------------------------------------|----------------------------------------------|----------------------------------|
| wt            | 1.7                                                    | 1028.1                                      | 634.35                                       | 368.9                            |
| V290W         | 2.2                                                    | 1667.8                                      | 1234.58                                      | 558.1                            |
| V1            | 1.1                                                    | 2377.5                                      | 1857.84                                      | 1,672.4                          |
| V2            | 2.3                                                    | 544.6                                       | 422.03                                       | 183.7                            |
| V3            | 1.8                                                    | 1552.9                                      | 1016.85                                      | 576.6                            |
| V9            | 1.6                                                    | 536.6                                       | 435.90                                       | 271.9                            |
| V16           | 2.3                                                    | 496.0                                       | 358.90                                       | 153.3                            |
| V18           | 1.1                                                    | 793.8                                       | 438.47                                       | 389.9                            |
| V19           | 1.6                                                    | 1673.4                                      | 1248.25                                      | 762.3                            |
| V20           | 1.9                                                    | 318.4                                       | 231.65                                       | 120.1                            |

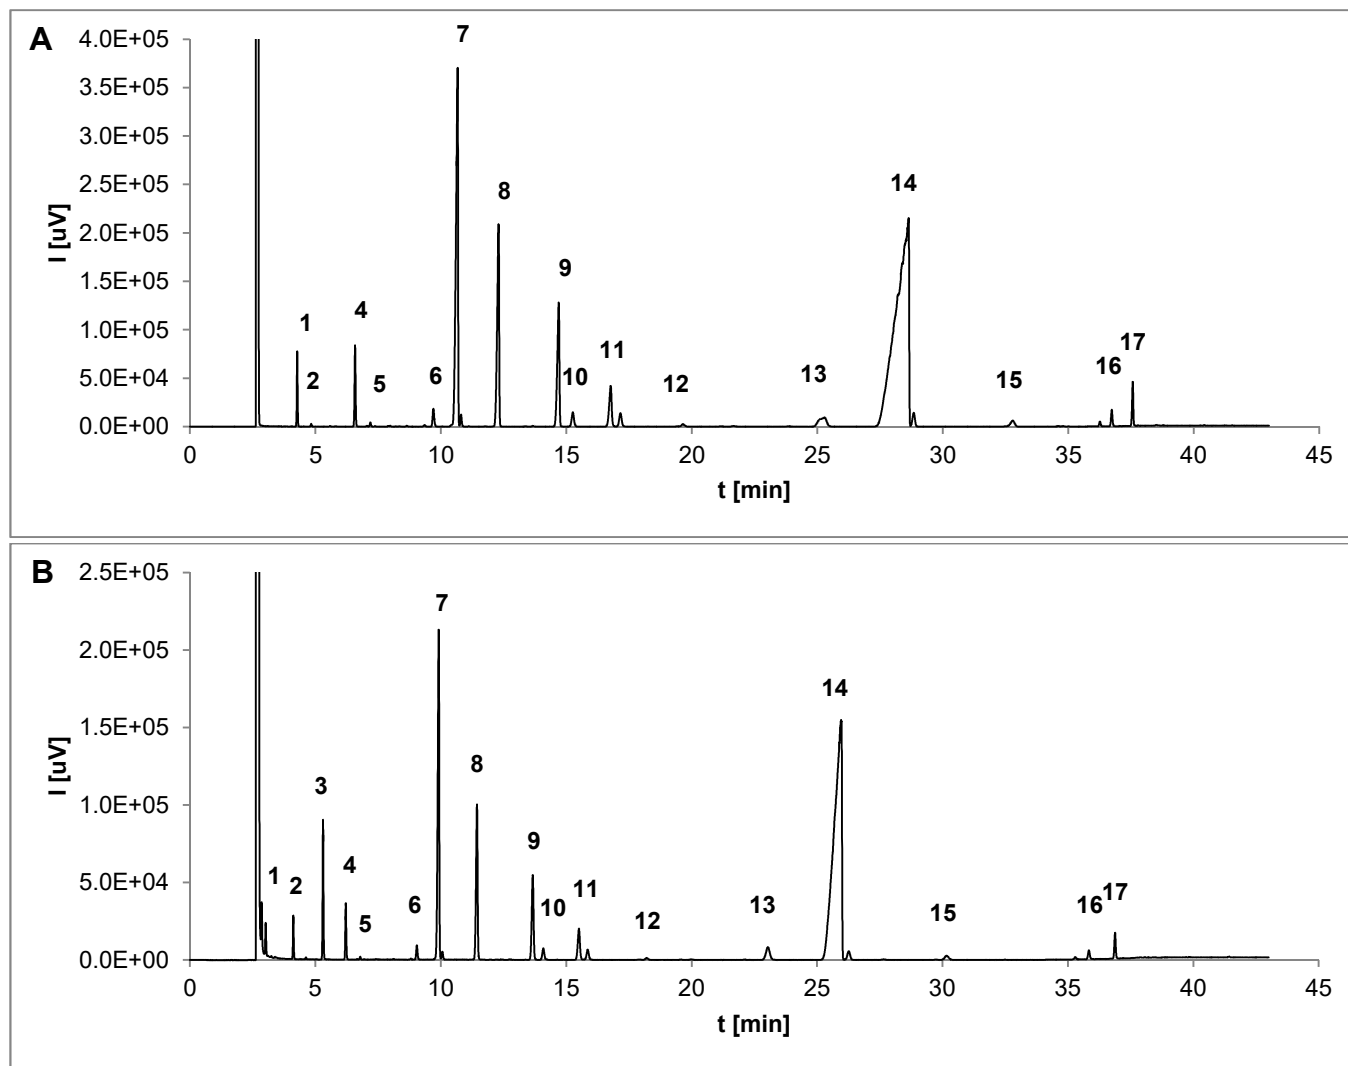

| Peak | FAEE  | FAEE $x_i$ [%] | FAME $x_i$ [%] |
|------|-------|----------------|----------------|
| 1    | C13:0 | 2 mM           | 2 mM           |
| 2    | C14:0 | 0.05           | 0.05           |
|      | C15:0 |                | 6 mM           |
| 4    | C16:0 | 1.77           | 1.81           |
| 5    | C16:1 | 0.10           | 0.09           |
| 6    | C18:0 | 0.62           | 0.64           |
| 7    | C18:1 | 16.85          | 16.13          |
| 8    | C18:2 | 8.65           | 7.66           |
| 9    | C18:3 | 5.69           | 4.69           |
| 10   | C20:0 | 0.72           | 0.73           |
| 11   | C20:1 | 2.95           | 2.81           |
| 12   | C20:2 | 0.11           | 0.13           |
| 13   | C22:0 | 1.53           | 1.49           |
| 14   | C22:1 | 58.68          | 57.66          |
| 15   | C22:2 | 0.45           | 0.41           |
| 16   | C24:0 | 0.52           | 0.49           |
| 17   | C24:1 | 1.14           | 1.08           |

**Figure S3.** Chromatograms of the FAEE derived from *Crambe* oil: (A) unmodified FAEE *Crambe* derivatives and (B) the total FA as FAME. Both samples contained ethyl tridecanoate (1) and tripentadecanoin (3) as external standards. In the table the mole fraction ( $x_i$ ) of the FA in the *Crambe* FAEE is displayed.

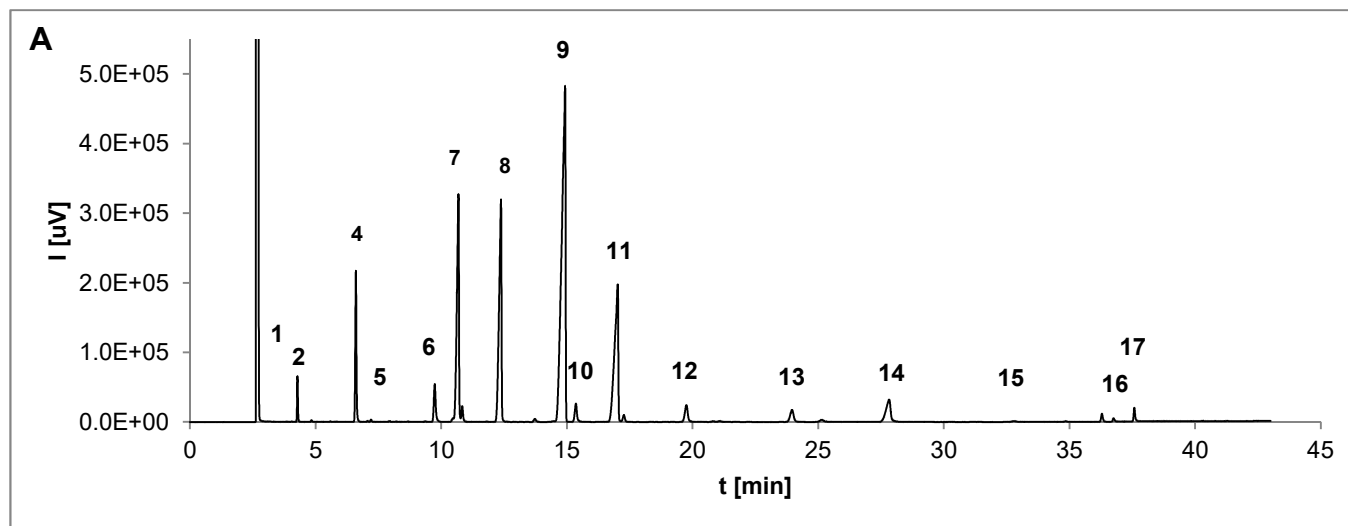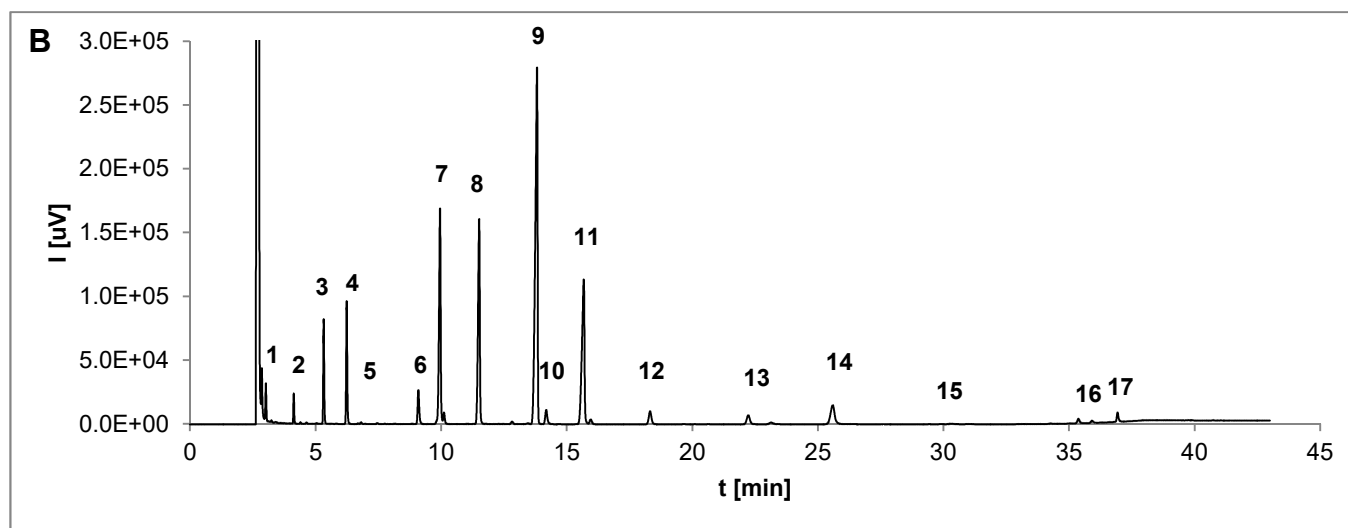

| Peak | FA    | FAEE<br>$x_i$ [%] | FAME<br>$x_i$ [%] |
|------|-------|-------------------|-------------------|
| 1    | C13:0 | 2 mM              | 2 mM              |
| 2    | C14:0 | 0.05              | 0.08              |
|      | C15:0 | -                 | 6 mM              |
| 4    | C16:0 | 5.46              | 5.68              |
| 5    | C16:1 | 0.07              | 0.09              |
| 6    | C18:0 | 2.18              | 2.33              |
| 7    | C18:1 | 15.31             | 15.98             |
| 8    | C18:2 | 15.81             | 15.56             |
| 9    | C18:3 | 37.95             | 35.37             |
| 10   | C20:0 | 1.20              | 1.31              |
| 11   | C20:1 | 15.38             | 16.26             |
| 12   | C20:2 | 1.45              | 1.47              |
| 13   | C22:0 | 1.24              | 1.16              |
| 14   | C22:1 | 3.06              | 3.15              |
| 15   | C22:2 | 0.09              | 0.10              |
| 16   | C24:0 | 0.18              | 0.17              |
| 17   | C24:1 | 0.60              | 0.64              |

**Figure S4.** Chromatograms of the FAEE derived from *Camelina* oil: (A) unmodified FAEE *Camelina* derivatives and (B) the total FA as FAME. Both samples contained ethyl tridecanoate (1) and tripentadecanoin (3) as external standards. In the table the mole fraction ( $x_i$ ) of the FA in the *Camelina* FAEE is displayed.

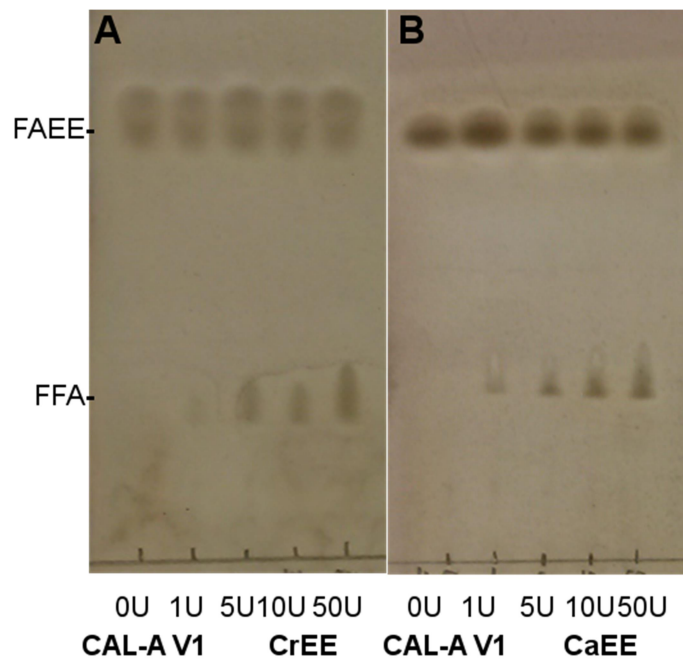

**Figure S5.** Exemplary thin-layer chromatography showing the reactions of 0, 1, 5, 10, and 50 U CAL-A V1 with *Crambe* and *Camelina* FAEE on aluminum silica foils dyed with potassium permanganate solution.

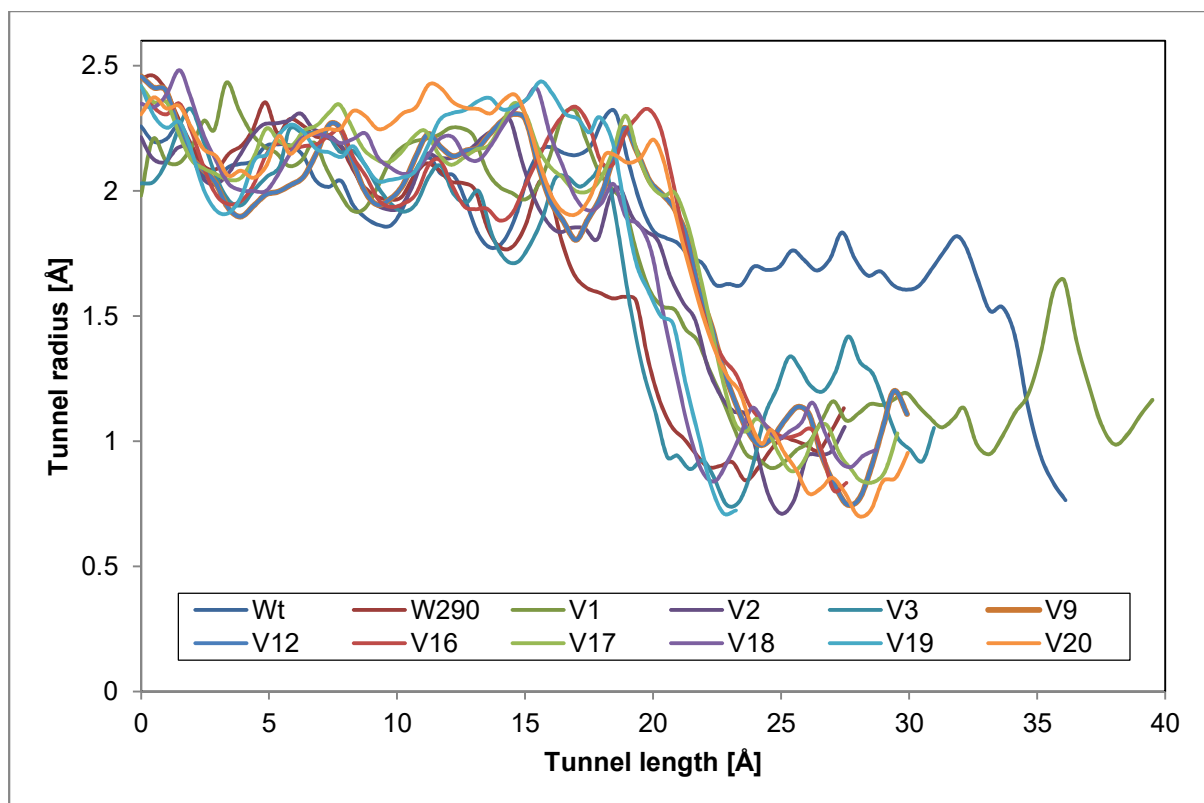

**Figure S6.** Tunnel calculations with Caver Analyst 1.0 for CAL-A Wt, the single mutant V290W, the double mutants V1, 2, 3, 9, and 12, and the triple mutants V16-20. The tunnel graphs are displayed for the fatty acid binding tunnel calculated from the catalytic Ser185 with a min. probe radius of 0.6-0.7.

**Table S5.** Estimated dimensions of the fatty acid molecules.

| Fatty acid   | Length [Å]  | Distance double bond [Å] |
|--------------|-------------|--------------------------|
| Oleic acid   | 19.0 - 21.3 | 9.5 - 11.2               |
| Gondoic acid | 20.4 - 23.8 | 10.4 - 13.6              |
| Erucic acid  | 21.8 - 26.3 | 13.2 - 16.1              |

**Table S6.** Primers used to generate CAL-A libraries I to III

| Primer name                 | Primer Sequence                                                                                                                                                      |
|-----------------------------|----------------------------------------------------------------------------------------------------------------------------------------------------------------------|
| 15.15 pET-RP rv             | CTAGTTATTGCTCAGCGG                                                                                                                                                   |
| 16.19 QC/MW1 CAL-A V286X rv | CAGGCTAAA <b>CAC</b> GTTTCAGAAACGGATAG<br>CAGGCTAAA <b>NDT</b> GTTTCAGAAACGGATAG<br>CAGGCTAAA <b>VHG</b> GTTTCAGAAACGGATAG<br>CAGGCTAAA <b>TGG</b> GTTTCAGAAACGGATAG |
| 16.20 QC V290X fw           | TTTAGCCTG <b>GTG</b> AACGATACCAACCTG<br>TTTAGCCTG <b>NDT</b> AACGATACCAACCTG<br>TTTAGCCTG <b>VHG</b> AACGATACCAACCTG<br>TTTAGCCTG <b>TGG</b> AACGATACCAACCTG         |
| 16.21 MW1/MW2 V238X fw      | CCGGT <b>GTG</b> AGCGGTCTGAGC<br>CCGGT <b>NDT</b> AGCGGTCTGAGC<br>CCGGT <b>VHG</b> AGCGGTCTGAGC<br>CCGGT <b>TGG</b> AGCGGTCTGAGC                                     |
| 16.22 MW2 V290X rv          | GTATCGTT <b>CAC</b> CAGGCTAAACACGTTC<br>GTATCGTT <b>NDT</b> CAGGCTAAACACGTTC<br>GTATCGTT <b>VHG</b> CAGGCTAAACACGTTC<br>GTATCGTT <b>TGG</b> CAGGCTAAACACGTTC         |



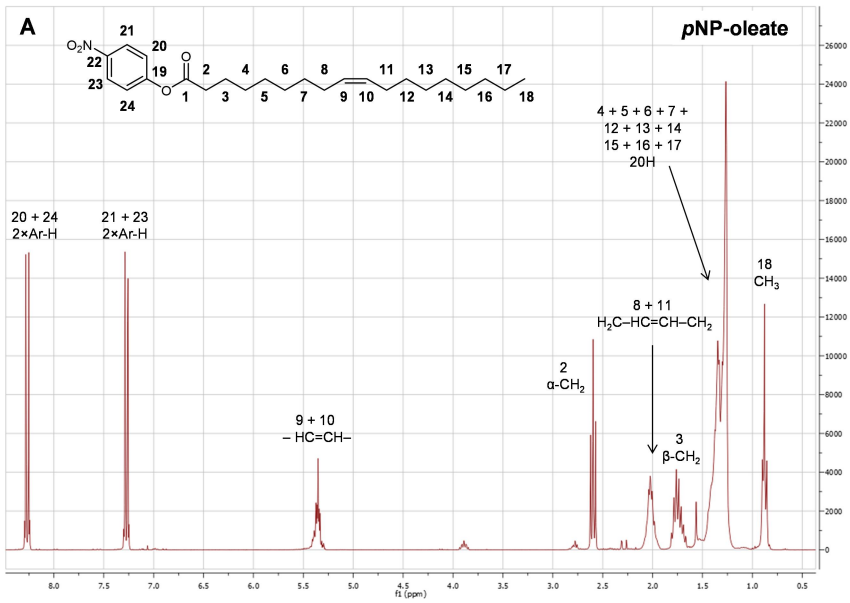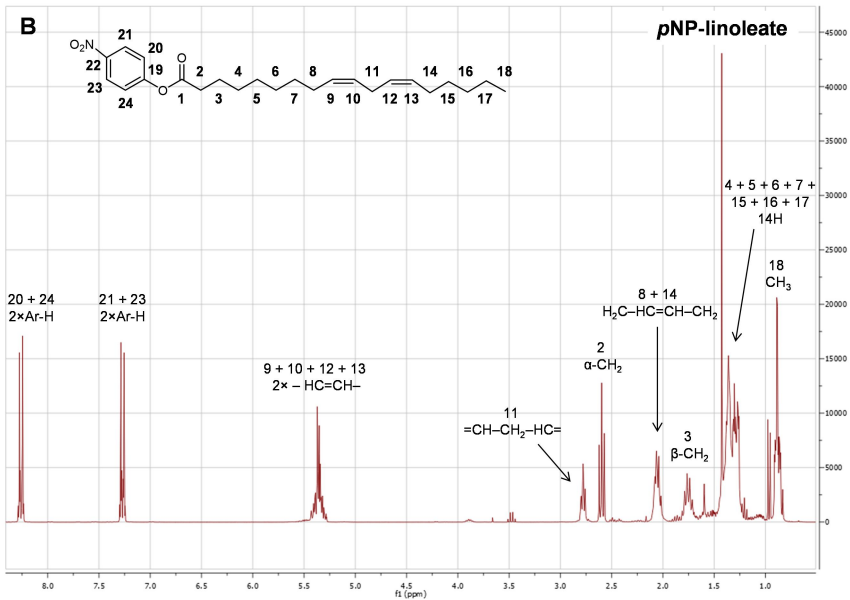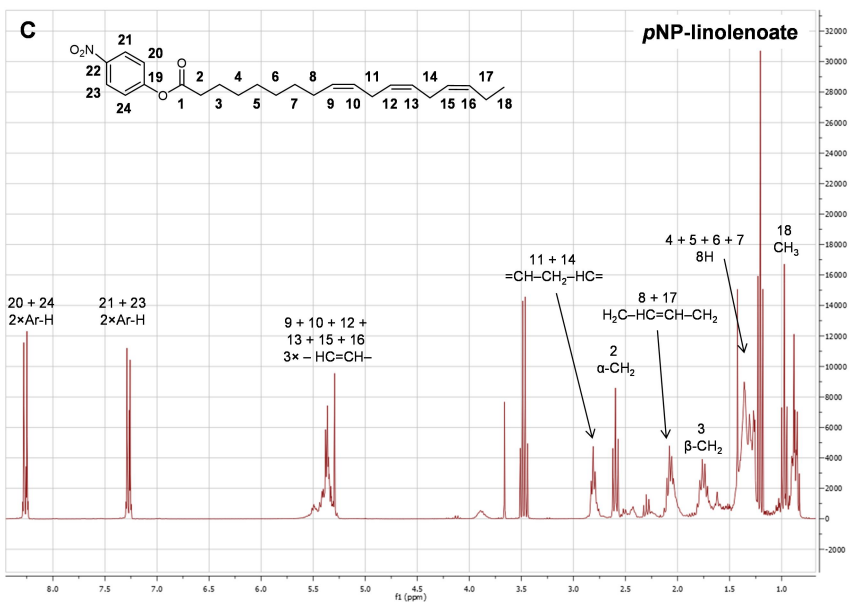

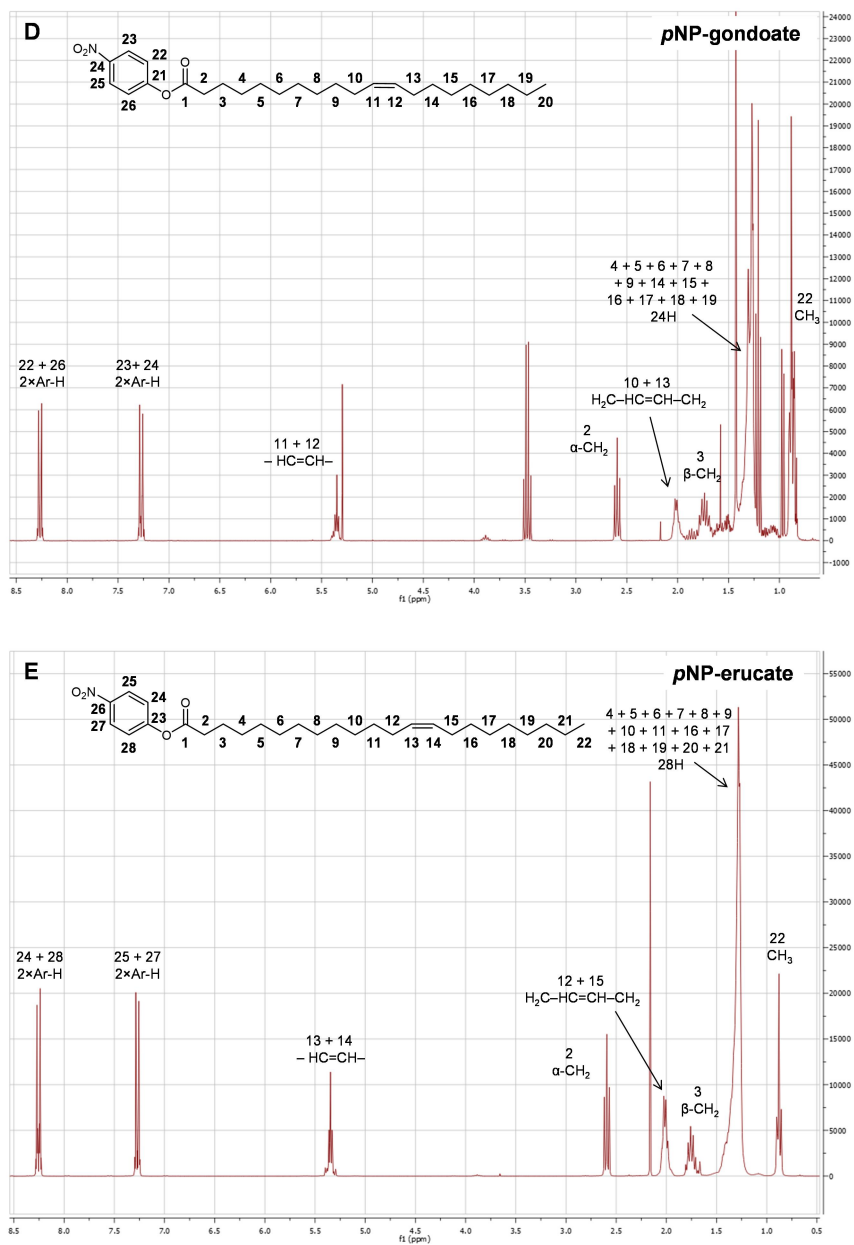

**Figure S7.** Observed  $^1\text{H}$  NMR spectra of (A) *p*NP-oleate, (B) *p*NP-linoleate, (C) *p*NP-linolenate, (D) *p*NP-gondoate, (E) *p*NP-erucate.

**Table S7.** Primers and plasmids used to create the single, double and triple mutant vectors for *P. pastoris* overexpression.

| CAL-A variant | Resulting plasmid                          | Plasmid template                      | Primer fw name           | Primer rv name           |
|---------------|--------------------------------------------|---------------------------------------|--------------------------|--------------------------|
| V238L         | pGAPZ $\alpha$ -CALA-His V238L             | pGAPZ $\alpha$ -CALA-His              | CALA V238L QC fw         | CALA V238L QC rv         |
|               | pPICZ $\alpha$ -CALA-His V238L             | pPICZ $\alpha$ -CALA-His              |                          |                          |
| V238I         | pGAPZ $\alpha$ -CALA-His V238I             | pGAPZ $\alpha$ -CALA-His              | CALA V238I QC fw         | CALA V238I QC rv         |
|               | pPICZ $\alpha$ -CALA-His V238I             | pPICZ $\alpha$ -CALA-His              |                          |                          |
| V238Y         | pGAPZ $\alpha$ -CALA-His V238Y             | pGAPZ $\alpha$ -CALA-His              | CALA V238Y QC fw         | CALA V238Y QC rv         |
|               | pPICZ $\alpha$ -CALA-His V238Y             | pPICZ $\alpha$ -CALA-His              |                          |                          |
| V286Q         | pGAPZ $\alpha$ -CALA-His V286Q             | pGAPZ $\alpha$ -CALA-His              | CALA V286Q QC fw         | CALA V286Q QC rv         |
|               | pPICZ $\alpha$ -CALA-His V286Q             | pPICZ $\alpha$ -CALA-His              |                          |                          |
| V290L         | pGAPZ $\alpha$ -CALA-His V290L             | pGAPZ $\alpha$ -CALA-His              | CALA V290L QC fw         | CALA V290L QC rv         |
| V290M         | pGAPZ $\alpha$ -CALA-His V290M             | pGAPZ $\alpha$ -CALA-His              | CALA V290M QC fw         | CALA V290M QC rv         |
| V290N         | pGAPZ $\alpha$ -CALA-His V290N             | pGAPZ $\alpha$ -CALA-His              | CALA V290N QC fw         | CALA V290N QC rv         |
| V290W         | pGAPZ $\alpha$ -CALA-His V290W             | pGAPZ $\alpha$ -CALA-His              | CALA V290W QC fw         | CALA V290W QC rv         |
|               | pPICZ $\alpha$ -CALA-His V290W             | pPICZ $\alpha$ -CALA-His              |                          |                          |
| V1            | pPICZ $\alpha$ -CALA-His V238L V290L       | pPICZ $\alpha$ B-CALA-His V238L       | CALA V290L QC fw         | CALA V290L QC rv         |
| V2            | pPICZ $\alpha$ -CALA-His V238Y V290N       | pPICZ $\alpha$ B-CALA-His V238Y       | CALA V290N QC fw         | CALA V290N QC rv         |
| V3            | pPICZ $\alpha$ -CALA-His V238I V290M       | pPICZ $\alpha$ B-CALA-His V238I       | CALA V290M QC fw         | CALA V290M QC rv         |
| V9            | pPICZ $\alpha$ -CALA-His V286Q V290W       | pPICZ $\alpha$ B-CALA-His V286Q       | CALA (V286Q) V290W QC fw | CALA (V286Q) V290W QC rv |
| V12           | pPICZ $\alpha$ -CALA-His V238L V290N       | pPICZ $\alpha$ B-CALA-His V238L       | CALA V290N QC fw         | CALA V290N QC rv         |
| V16           | pPICZ $\alpha$ -CALA-His V238L V286Q V290L | pPICZ $\alpha$ -CALA-His V238L, V290L | CALA V286Q (V290L) QC fw | CALA V286Q (V290L) QC rv |
| V17           | pPICZ $\alpha$ -CALA-His V238Y V286Q V290N | pPICZ $\alpha$ -CALA-His V238Y, V290N | CALA V286Q (V290N) QC fw | CALA V286Q (V290N) QC rv |
| V18           | pPICZ $\alpha$ -CALA-His V238I V286Q V290M | pPICZ $\alpha$ -CALA-His V238I, V290M | CALA V286Q (V290M) QC fw | CALA V286Q (V290M) QC rv |
| V19           | pPICZ $\alpha$ -CALA-His V238L V286Q V290W | pPICZ $\alpha$ -CALA-His V286Q, V290W | CALA V238L QC fw         | CALA V238L QC rv         |
| V20           | pPICZ $\alpha$ -CALA-His V238I V286Q V290W | pPICZ $\alpha$ -CALA-His V286Q, V290W | CALA V238I QC fw         | CALA V238I QC rv         |

**Table S8.** Sequences of the primers used to create the single, double and triple mutant vectors for *P. pastoris* overexpression.

| Primer name           | Sequence fw                                   | Sequence rv                                    |
|-----------------------|-----------------------------------------------|------------------------------------------------|
| CALA V238L QC         | 5'-GCCCTGGCGGGTCTTTTCGGGTCTCT-3'              | 5'-AGAGACCCGAAAGACCCGCCAGGGC-3'                |
| CALA V238I QC         | 5'-TGCCCTGGCGGGTATTTTCGGGTCTCTC-3'            | 5'-GAGAGACCCGAAATACCCGCCAGGGCA-3'              |
| CALA V238Y QC         | 5'-TTGCCCTGGCGGGTATTTCGGGTCTCTCGC-3'          | 5'-GCGAGAGACCCGAATAACCCGCCAGGGCAA-3'           |
| CALA V286Q QC         | 5'-CCTACCCCTTCCTCAACCAGTTCTCGCTGGTCAACGA-3'   | 5'-TCGTTGACCAGCGAGAAGTGGTTGAGGAAGGGGTAGG-3'    |
| CALA V290L QC         | 5'-AACGTCTTCTCGCTGCTCAACGACACGAACC-3'         | 5'-GGTTCGTGTCGTTGAGCAGCGAGAAGACGTT-3'          |
| CALA V290M QC         | 5'-CAACGTCTTCTCGCTGATGAACGACACGAACCTGC-3'     | 5'-GCAGGTTTCGTGTCGTTTCATCAGCGAGAAGACGTTG-3'    |
| CALA V290N QC         | 5'-TCAACGTCTTCTCGCTGAACAACGACACGAACCTGC-3'    | 5'-GCAGGTTTCGTGTCGTTGTTTCAGCGAGAAGACGTTGA-3'   |
| CALA V290W QC         | 5'-CTCAACGTCTTCTCGCTGTGGAACGACACGAACCTGCTC-3' | 5'-GAGCAGGTTTCGTGTCGTTCCACAGCGAGAAGACGTTGAG-3' |
| CALA (V286Q) V290W QC | 5'-CTCAACCAGTTCTCGCTGTGGAACGACACGAACCTGCTC-3' | 5'-GAGCAGGTTTCGTGTCGTTCCACAGCGAGAAGTGGTTGAG-3' |
| CALA (V290L) V286Q QC | 5'-CCTACCCCTTCCTCAACCAGTTCTCGCTGCTCAACGA-3'   | 5'-TCGTTGAGCAGCGAGAAGTGGTTGAGGAAGGGGTAGG-3'    |
| CALA (V290N) V286Q QC | 5'-CCTACCCCTTCCTCAACCAGTTCTCGCTGAACAACGA-3'   | 5'-TCGTTGTTTCAGCGAGAAGTGGTTGAGGAAGGGGTAGG-3'   |
| CALA (V290M) V286Q QC | 5'-CCTACCCCTTCCTCAACCAGTTCTCGCTGATGAACGA-3'   | 5'-TCGTTTCATCAGCGAGAAGTGGTTGAGGAAGGGGTAGG-3'   |
